# Supplementary material for: Effects of pH on AHL signal release and properties of ANAMMOX granules with different biomass densities
Source: Royal Society of Chemistry journal article supplement (doi:10.1039/c9ew00581a), 2019-01-01
Supplement: c9ew00581a1.pdf [file c9ew00581a1.pdf]

## Support materials

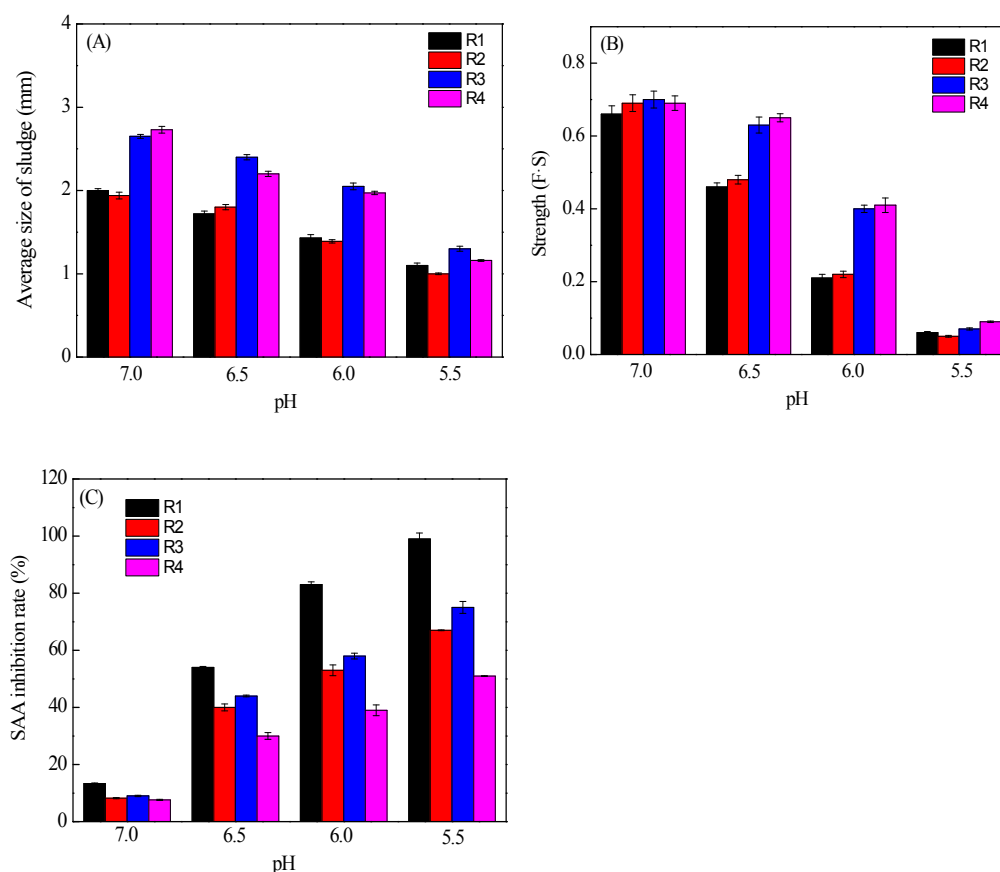

Fig. S1 (A) The average size, (B) the strength and (C) the specific ANAMMOX activity (SAA) inhibition rate of granules with low biomass density when the different types of exogenous AHLs were added under the neutral and acidic conditions. Error bars are defined as standard error of the mean ( $n = 9$ ), error  $< \pm 3\%$ . “R1”, “R2”, “R3” and “R4” represent the group without exogenous AHLs, the group with adding exogenous C6-HSL, the group with adding exogenous C8-HSL and the group with adding exogenous C6-HSL and C8-HSL, respectively.
